# Supplementary material
Source: PubMed Central journal article supplement (PMC3140958)

Supplemental Figure 1

**A) 2 Phases (G1\_S; G1\_M; or S\_M)**

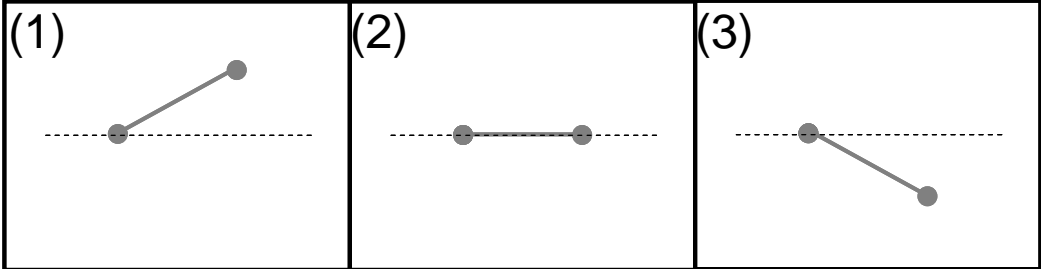

**B) 3 Phases (G1\_S\_M)**

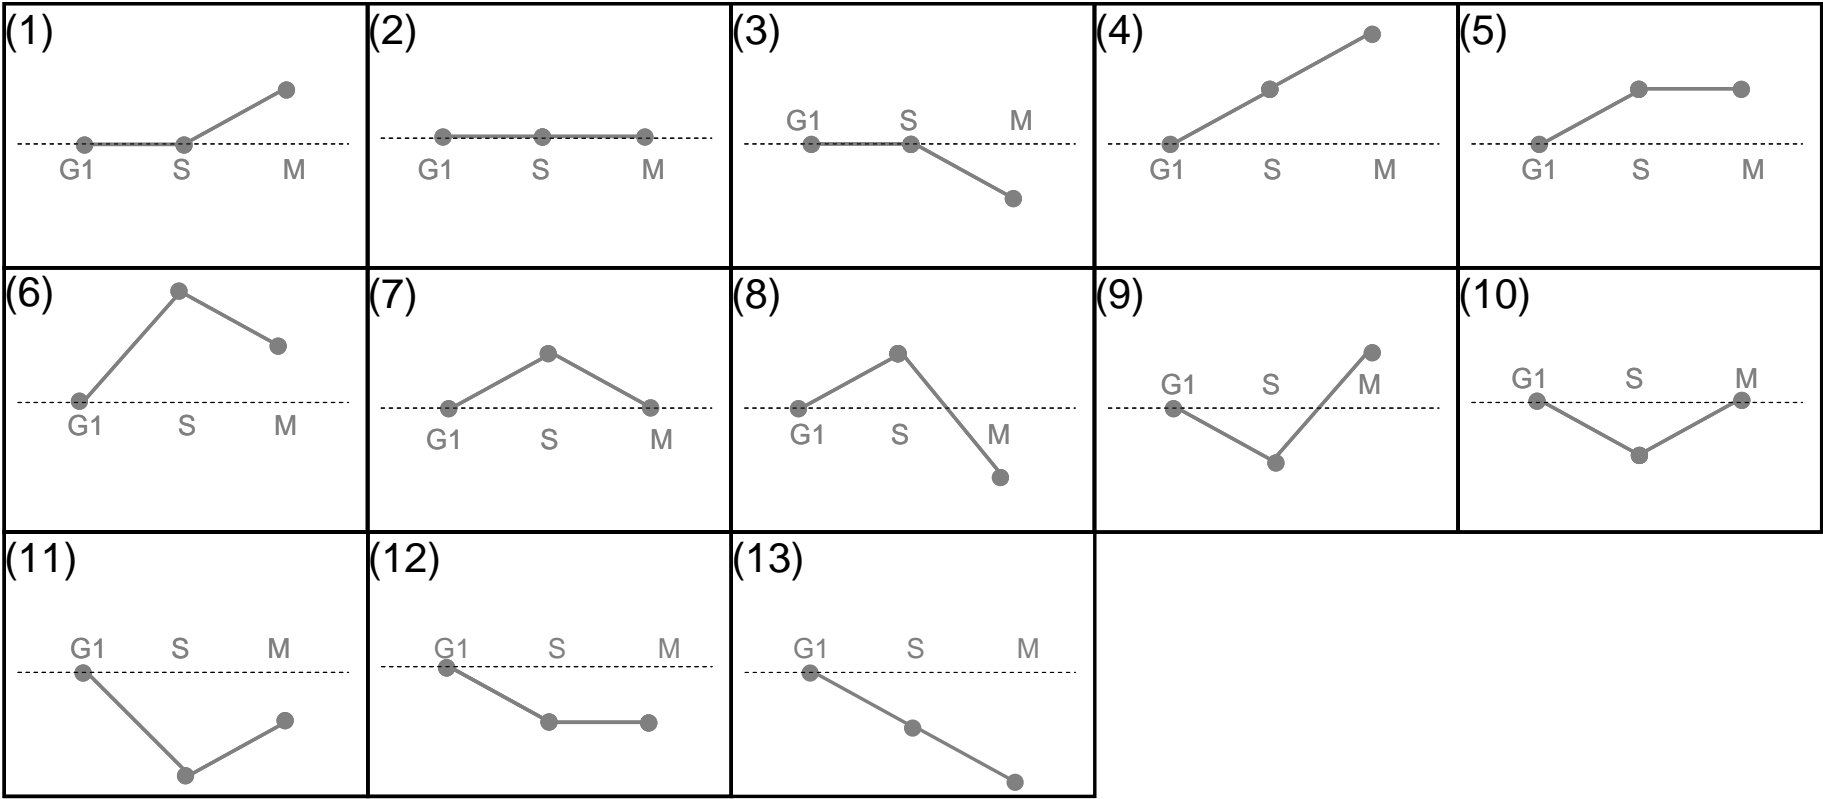

Supplemental Figure 2

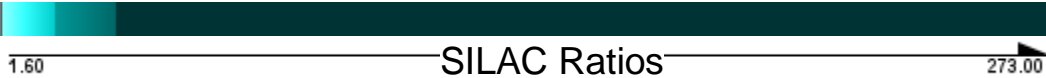

G1 Phase

S Phase

M Phase

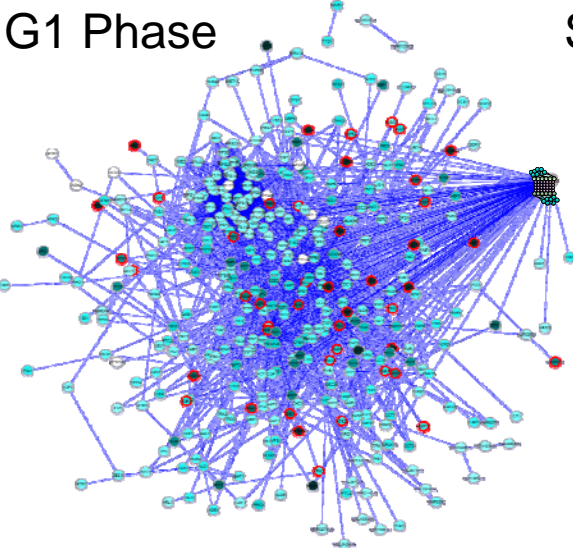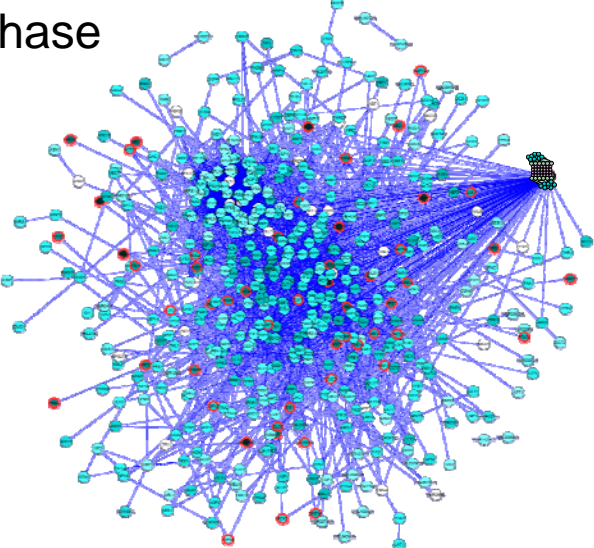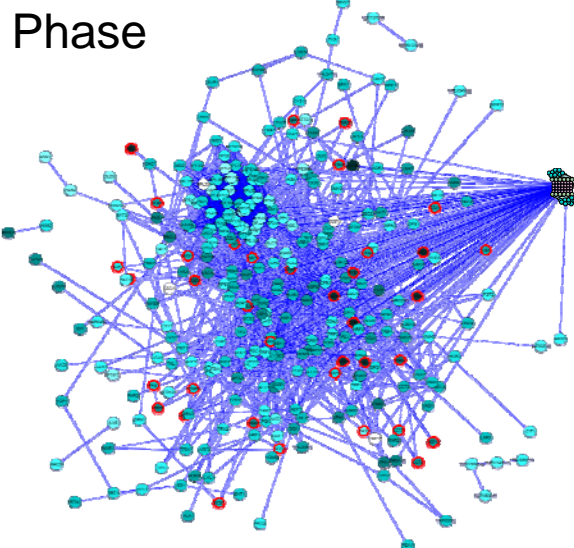

Supplement: NIHMS305461-supplement-Suppl_data.pdf [file NIHMS305461-supplement-Suppl_data.pdf]
